# Supplementary material
Source: PubMed Central journal article supplement (PMC7964685)
Supplement: 14-01226.pdf [file 14-01226.pdf]

**On-line Table 1: Demographic data, clinical presentation, and DWI findings of all patients in the study**

| Patient | Age (yr) | Sex    | Lacunar Syndrome       | Vascular Territory        | DWI Lesion                      |
|---------|----------|--------|------------------------|---------------------------|---------------------------------|
| 1       | 64       | Male   | Pure sensory           | —                         | No lesion                       |
| 2       | 63       | Female | Ataxic hemiparesis     | Thalamoperforant          | Capsulothalamic LI              |
| 3       | 79       | Male   | Pure sensory           | Posterior cerebral artery | Spotted lesions non-LI          |
| 4       | 70       | Male   | Sensorimotor           | Lenticulostriate          | Subcortical non-LI              |
| 5       | 62       | Male   | Sensorimotor           | —                         | No lesion                       |
| 6       | 63       | Male   | Ataxic hemiparesis     | —                         | No lesion                       |
| 7       | 63       | Male   | Pure motor             | Paramedian                | Brain stem LI                   |
| 8       | 58       | Female | Sensorimotor           | Lenticulostriate          | Lenticular LI                   |
| 9       | 58       | Male   | Ataxic hemiparesis     | Thalamoperforant          | Capsulothalamic LI              |
| 10      | 76       | Female | Pure motor             | —                         | No lesion                       |
| 11      | 51       | Male   | Sensorimotor           | Lenticulostriate          | Lenticular LI                   |
| 12      | 35       | Female | Ataxic hemiparesis     | Middle cerebral artery    | Non-LI in the centrum semiovale |
| 13      | 63       | Male   | Sensorimotor           | Lenticulostriate          | Subcortical non-LI              |
| 14      | 71       | Male   | Pure sensory           | Middle cerebral artery    | Spotted lesions non-LI          |
| 15      | 72       | Male   | Dysarthria clumsy hand | Paramedian                | Brain stem LI                   |
| 16      | 84       | Male   | Sensorimotor           | Middle cerebral artery    | Cortical non-LI                 |
| 17      | 79       | Male   | Pure motor             | Paramedian                | Brain stem LI                   |
| 18      | 80       | Female | Sensorimotor           | Middle cerebral artery    | Cortical non-LI                 |
| 19      | 66       | Male   | Pure sensory           | Middle cerebral artery    | Cortical non-LI                 |
| 20      | 60       | Female | Sensorimotor           | Posterior cerebral artery | Spotted lesions non-LI          |
| 21      | 63       | Male   | Sensorimotor           | Basilar artery            | Thalamic-mesencephalic non-LI   |
| 22      | 61       | Female | Pure motor             | White matter medullary    | Centrum semiovale LI            |
| 23      | 51       | Male   | Pure motor             | Paramedian                | Brain stem LI                   |
| 24      | 59       | Male   | Pure motor             | Lenticulostriate          | Subcortical non-LI              |
| 25      | 78       | Male   | Pure motor             | Lenticulostriate          | Subcortical non-LI              |
| 26      | 70       | Female | Pure motor             | Thalamoperforant          | Thalamic LI                     |
| 27      | 64       | Male   | Pure motor             | Paramedian                | Brain stem LI                   |
| 28      | 78       | Female | Pure motor             | Thalamoperforant          | Thalamic LI                     |
| 29      | 54       | Male   | Pure sensory           | Thalamoperforant          | Thalamic LI                     |
| 30      | 55       | Male   | Sensorimotor           | Thalamoperforant          | Thalamic LI                     |
| 31      | 76       | Male   | Sensorimotor           | Paramedian                | Thalamic LI                     |
| 32      | 80       | Male   | Ataxic hemiparesis     | Lenticulostriate          | Subcortical non-LI              |
| 33      | 69       | Female | Ataxic hemiparesis     | Thalamoperforant          | Thalamic LI                     |

**Note:**—non-LI indicates nonlacunar infarct.

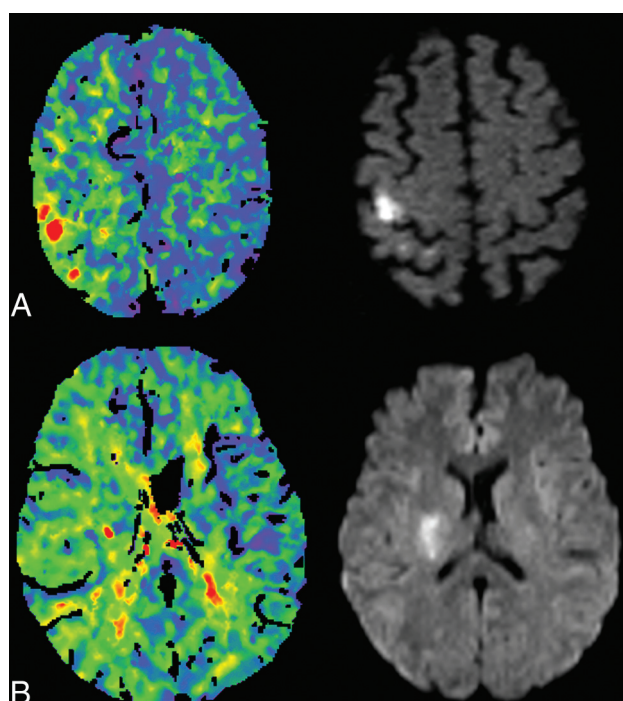

**ON-LINE FIG 1.** Examples of CTP in nonlacunar infarcts. *A*, TTD map (*left*) and final DWI lesion (*right*) in a patient with pure motor syndrome in whom CTP identified a nonlacunar stroke. *B*, A case in which the initial TTD map showed a small lacunar capsular lesion that was larger than the 1.767-cm<sup>3</sup> limit in the follow-up MR imaging.

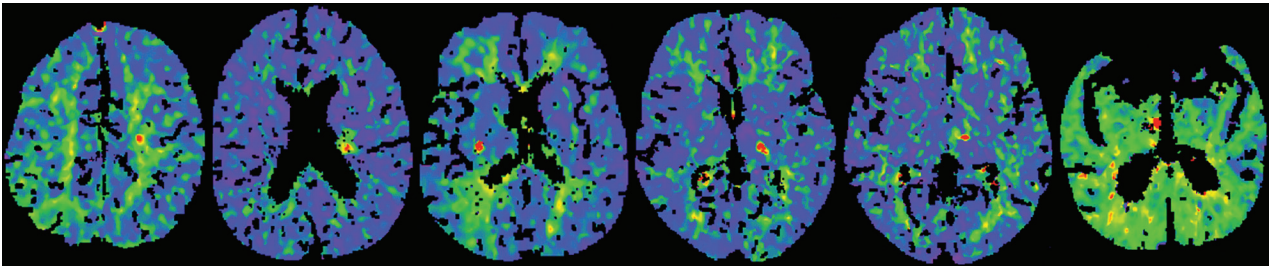

**ON-LINE FIG 2.** Examples of lacunar infarcts as seen in TTD maps. Lis were best seen in TTD maps, where they often appeared as small red dots. In TTP maps, the lesions were sometimes just little black holes, and in MTT maps, Lis were often difficult to differentiate from the background.
